# Supplementary material
Source: publisher figshare collection journal article supplement (https://gsajournals.figshare.com/ndownloader/files/14394617)
Supplement: Supplementary file 1 [file 14394617]

## Sheet: 2L
Dataset S3. Master List of Anopheles gambiae miRNAs in chromosome order.
Chromosome 2L
miRNA name	Genome Loci	intragenic miRNA
miR-2944a-2	2L: 3537080-3537136 [-]
miR-286b	2L: 3537482-3537547 [-]
miR-PN33-5p	2L: 5268925-5268948 [+]
miR-PN27-3p	2L: 5507616-5507640 [+]
miR-PN32-1 5p	2L: 6294169-6294193 [+], 3L 9986811- 9986787 [-]
miR-7	2L: 8302899-8302985 [-]	AGAP005015
miR-PN6-3p	2L: 9916570-9916683 [+]	AGAP005091
miR-137	2L: 11039426-11039516 [+]
miR-9a	2L: 15089290-15089370 [-]
miR-281	2L: 17362522 -17362421[-]
miR-282	2L: 17496155-17496247 [-]
miR-263b	2L: 17784444-17784539 [+]
miR-276	2L: 18991754-18991845 [+]
miR-219	2L: 21839672-21839758 [-]
miR-2L_14200	2L: 27005652-27005540 [-]	AGAP006121
miR-2b	2L: 37757412-37757490 [-]	AGAP029116
miR-13b	2L: 37757564-37757657 [-]	AGAP029116
miR-2c	2L: 37758085-37758193 [-]	AGAP029116
miR-N1-3p	2L: 37758184 -37758162 [-]	AGAP029116
miR-2-1	2L: 37758796 -37758699[-]	AGAP029116
miR-71	2L: 37759568 -37759477 [-]	AGAP029116
miR-988	2L: 39359054-39359155 [+]	AGAP006885
miR-PN18-5p	2L: 42944574-42944591 [+]
miR-2L_14684	2L: 43745856-43745745 [-]
miR-190	2L: 46755772-46755872 [-]	AGAP007474
miR-12417	2L: 48562288-48562365 [+]

## Sheet: 2R
Dataset S3. Master List of Anopheles gambiae miRNAs in chromosome order.
Chromosome 2R
miRNA name	Genome Loci	intragenic miRNA
miR-10376	2R: 2995184-2995258 [+]	AGAP001322
miR-N12-3p	2R: 7197967-7197857 [-]
miR-999	2R: 8265271-8265160 [-]	AGAP001683
miR-1174	2R: 9129499-9129675 [+]
miR-1175	2R: 9129786-9129865 [+]
miR-11	2R: 13042022-13042111 [+]	AGAP001978
miR-998	2R: 13042382-13042491 [+]	AGAP001978
miR-1000	2R: 13241765-13241857 [+]
miR-932	2R: 15199812-15199921 [+]	AGAP002090
miR-10378	2R: 18852626-18852723 [-]
miR-980	2R: 21985976-21985863 [-]
miR-2796	2R: 22427251-22427360 [+]	AGAP002529
miR-34	2R: 28232667-28232756 [-]
miR-277	2R: 28234523-28234612 [-]
miR-317	2R: 28251997-28252086 [-]
bantam	2R: 33274498-33274608 [+]
miR-315	2R: 33703164-33703239 [+]
miR-10367	2R: 34624575-34624634 [-]
miR-2765	2R: 36338005-36337958 [-], UNKN 36488050-36488046 [-]
miR-12414	2R: 36376058-36376154 [-]	AGAP003349
miR-12	2R: 37888037-37888153 [-]	AGAP003457
miR-1889	2R: 37888789-37888919 [-]	AGAP003457
miR-283	2R: 37890034-37890125 [-]	AGAP003457
miR-929	2R: 38819522-38819434 [-]	AGAP003509
miR-92a	2R: 39181115-39181203 [+]
miR-92b	2R: 39200608-39200694 [+]
miR-PN35-3p	2R: 49467496-49467606 [+]	AGAP004071
miR-252	2R: 52693390-52693280 [-]
miR-996	2R: 55572842-55572910 [-]	AGAP004392
miR-279	2R: 55573327-55573415 [-]	AGAP004392
miR-PN17-3p	2R: 57684067-57684088 [+]	AGAP004572
miR-993	2R: 59284604-59284723 [-]
miR-10	2R: 59711765-59711866 [-]
miR-iab-4	2R: 60297556-60297639 [+]

## Sheet: 3L
Dataset S3. Master List of Anopheles gambiae miRNAs in chromosome order.
Chromosome 3L
miRNA name	Genome Loci	intragenic miRNA
miR-989	3L: 2905395-2905525 [+]
miR-10373	3L: 4587583-4587658 [+]
miR-3L_35860	3L: 6390066-6390178 [+]	AGAP028613
miR-PN32-2 5p	3L 9986811- 9986787 [-], 2L: 6294169-6294193 [+]
miR-957	3L: 14911228-14911321 [+]
miR-10365	3L: 17216221-17216288 [+]
miR-193	3L: 30135933-30136026 [+]	AGAP011622
miR-PN13-5p	3L: 31252187- 31252163 [-]
miR-278	3L: 34112621-34112703 [-]
miR-PN16-5p	3L: 34333697-34333717 [+]	AGAP011870
miR-307	3L: 34537912-34538009 [+]	AGAP011870
miR-8	3L: 38943045-38943130 [+]
miR-285	3L: 39242638-39242747 [+]
miR-2942	3L: 39686838-39686949 [+]
miR-308	3L: 40899904-40900003 [-]
miR-316	3L: 41240255-41240178 [-]
miR-PN19-5p	3L 41925835-41925946 [+]	AGAP012424

## Sheet: 3R
Dataset S3. Master List of Anopheles gambiae miRNAs in chromosome order.
Chromosome 3R
miRNA name	Genome Loci	intragenic miRNA
miR-PN5-5p	3R: 507015-506903 [-]	AGAP007767
miR-1891	3R: 5819038-5819138 [-]
miR-9b	3R: 5887786-5887878 [-]	AGAP008118
miR-79	3R: 5888298-5888391 [-]	AGAP008118
miR-306	3R: 5888600-5888675 [-]	AGAP008118
miR-9c	3R: 5891167-5891256 [-]	AGAP008118
miR-PN34-3p	3R: 10043747-10043637 [-]
miR-125	3R: 10270160-10270271 [-]
let-7	3R: 10270708-10270797 [-]
miR-100	3R: 10274677-10274768 [-]
miR-2945	3R: 10314422-10314311 [-]	AGAP008397
miR-1	3R: 10569154-10569251 [-]
miR-965-1	3R: 11096169-11096272 [+]
miR-965-2	3R: 11101688-11101791 [+]
miR-263a	3R: 12395476-12395561 [+]
miR-133	3R: 15075187-15075263 [-]
miR-PN26-5p	3R: 17944318-17944206 [-]	AGAP008794
miR-3R_8209	3R: 19368440-19368330 [-]	AGAP008843
miR-PN8-3p	3R: 19372245-19372134 [-]	AGAP008843
miR-10377b	3R: 19372525-19372629 [-]	AGAP008843
miR-10377a	3R: 19372881-19372972 [-]	AGAP008843
miR-3R_8221	3R: 19376051-19375940 [-]	AGAP008843
miR-1890	3R: 21181082-21181177 [-]
miR-14	3R: 24898041-24898134 [+]
miR-124	3R: 29001980-29002062 [+]
miR-275	3R: 38377342-38377436 [+]
miR-305	3R: 38386246-38386335 [+]
miR-10381	3R: 42055853-42055956 [+]	AGAP009738
miR-184	3R: 42632357-42632438 [+]
miR-309	3R: 43008711-43008784 [-]
miR-2944a-1	3R: 43008954-43008843 [-]
miR-2944b	3R: 43009147-43009035 [-]
miR-286	3R: 43009395-43009490 [-]
miR-12418	3R: 44916363-44916443 [-]
miR-375	3R: 51640560-51640668 [-]
miR-PN30-5p	3R: 52847702-52847814 [+]

## Sheet: X
Dataset S3. Master List of Anopheles gambiae miRNAs in chromosome order
Chromosome X
miRNA name	Genome Loci	intragenic miRNA
miR-970	x: 112022-112119 [-]	AGAP000009
miR-87	x: 261172-261271 [-]	AGAP000019
miR-X_41652	x: 1032358-1032247 [-]
miR-981	x: 1228287-1228381 [+]
miR-33	x: 1256105-1255994 [-]	AGAP000076
miR-10355	X: 1723972-1724033 [+]
miR-2940	x: 2840551-2840440 [-]
miR-PN29-3p	x: 6133175-6133064 [-]
miR-10368	X: 7416770-7416834 [-]
miR-10379	X: 7417600-7417679 [-]
miR-PN12-3p	x: 10416017-10416038 [+]	AGAP000585
miR-31	x: 14375903-14376013 [+]
miR-10366b	X: 15128214-15128270 [-]
miR-10372a	X: 15152858-15152916 [-]
miR-10370-2	X: 15153352-15153415 [-]
miR-10366a-1	X: 15153636-15153695 [-]
miR-10372b	X: 15179292-15179349 [-]
miR-10369	X: 15179879-15179934 [-]
miR-10370-1	X: 15180515-15180578 [-]
miR-10366a-2	X: 15180793-15180853 [-]
miR-X_39763	x: 17435423-17435535 [+]
miR-927	x: 18737368-18737460 [+]	AGAP000974
miR-210	x: 21450335-21450414 [+]
miR-12416	X: 23502516-23502590 [+]
miR-X_39763-2	x: 23765214-23765102 [-]
miR-10380	X: 23965282-23965364 [+]	AGAP001091

## Sheet: UNKN
Dataset S3. Master List of Anopheles gambiae miRNAs in chromosome order
Chromosome UNKN
miRNA name	Genome Loci
miR-N3-3p	UNKN: 30034602-30034492 [-]
miR-2765	2R: 36338005-36337958 [-], UNKN 36488050-36488046 [-]

## Sheet: intragenic miRNAs 
Dataset S3. Master List of Anopheles gambiae miRNAs in chromosome order
Intragenic miRNAs
Chromosome	miRNA	transcript	intragenic miRNA type
2L	miR-7	AGAP005015	intronic
	miR-PN6-3p	AGAP005091	intronic
	miR-2L_14200	AGAP006121	intronic
	miR-2b	AGAP029116	intronic
	miR-13b		intronic
	miR-2c		intronic
	miR-N1		intronic
	miR-2-1		intronic
	miR-71		intronic
	miR-988	AGAP006885	intronic
	miR-190	AGAP007474	intronic
2R	miR-10376	AGAP001322	coding region
	miR-999	AGAP001683	intronic
	miR-11	AGAP001978	intronic
	miR-998		intronic
	miR-932	AGAP002090	intronic
	miR-2796	AGAP002529	intronic
	miR-12414	AGAP003349	miRTron
	miR-12	AGAP003457	intronic
	miR-1889		intronic
	miR-283		intronic
	miR-929	AGAP003509	intronic
	miR-PN35-3p	AGAP004071	intronic
	miR-996	AGAP004392	intronic
	miR-279		intronic
	miR-PN17-3p	AGAP004572	intronic
3L	miR-3L_35860	AGAP028613	miRTron
	miR-193	AGAP011622	intronic
	miR-PN16-5p	AGAP011870	intronic
	miR-307		intronic
	miR-PN19-5p	AGAP012424	intronic
3R	miR-PN5-5p	AGAP007767	3' tailed miRTron
	miR-9b	AGAP008118	intronic
	miR-79		intronic
	miR-306		intronic
	miR-9c		intronic
	miR-2945	AGAP008397	intronic
	miR-PN26-5p	AGAP008794	intronic
	miR-3R_8209	AGAP008843	intronic
	miR-PN8-3p		intronic
	miR-10377b		intronic
	miR-10377a		intronic
	miR-3R_8221		intronic
	miR-10381	AGAP009738	3' tailed miRTron
X	miR-970	AGAP000009	intronic
	miR-87	AGAP000019	intronic
	miR-33	AGAP000076	intronic
	miR-PN12-3p	AGAP000585	intronic
	miR-927	AGAP000974	intronic
	miR-10380	AGAP001091	miRTron

## Sheet: miRNA clusters 
Dataset S3. Master List of Anopheles gambiae miRNAs in chromosome order
miRNA cluster info
Chromosome	Cluster	conserved/novel
2L	miR-2944a-2/miR-286b	conserved
	miR-2b/miR-13b/miR-2c/miR-N1-3p/miR2-1/miR-71	conserved
2R	miR-1174/miR-1175	conserved
	miR-11/miR-998	conserved
	miR-34/miR-277/miR-317	conserved
	miR-12/miR-1889/miR-283	conserved
	miR-92a/miR-92b	conserved
	miR-996/miR-279	conserved
3R	miR-9b/miR-79/miR-306/miR-9c	conserved
	miR-125/let-7/miR-100	conserved
	miR-965-1/miR-965-2	conserved
	miR-3R_8209/miR-PN8-3p/miR-10377b/miR-10377a/miR-3R_8221	novel
	miR-275/miR-305	conserved
	miR-309/miR-2944a-1/miR-2944b/miR-286	conserved
X	miR-10368/miR-10379	novel
	miR-10366b/miR-10372a/miR-10370-2/miR-10366a-1/miR-10372b/miR-10369/miR-10370-1/miR-10366a-2	novel
